# Supplementary material for: Lamellar thickness in semicrystalline polymers as a result of the competition between crystal growth and intracrystalline chain dynamics
Source: Research Square preprint supplement (doi:10.21203/rs.3.rs-638783/v1), 2021-07-09
Supplement: Supplementary file 1 [file 28f6c04931e48aa3e6a26320.xlsx]

## Sheet: PCL SAXS-data-Figure 3
sample: PCL138 at Tc=50°C (Figure 3)									sample: PCL138 at Tc=35°C (Figure 3)
time t	amorph. thickness da	distribution of da	crystalline. thickness dc	distribution of dc	longperiod L	normalized Porod-Parameter P			time t	amorph. thickness da	distribution of da	crystalline. thickness dc	distribution of dc	longperiod L	normalized Porod-Parameter P
min	nm	nm	nm	nm	nm	normalized to 0.58307			min	nm	nm	nm	nm	nm	normalized to 0.3185
10	--	--	--	--	--	0.0121575			2.5	9.00827	4.32813	6.31892	0.624168	15.3272	0.486432
30	--	--	--	--	--	0.012387			5	8.67074	4.07346	6.392	0.604072	15.0627	0.890711
50	--	--	--	--	--	0.0157464			7.5	8.35703	4.00565	6.48041	0.618858	14.8374	0.991559
70	--	--	--	--	--	0.0203096			10	8.24194	3.97097	6.50307	0.594575	14.745	0.999652
90	--	--	--	--	--	0.0280564			12.5	8.23149	3.93535	6.52914	0.601302	14.7606	1.00001
110	--	--	--	--	--	0.0368522			15	8.17907	3.92944	6.53135	0.58561	14.7104	1.00368
130	--	--	--	--	--	0.0460058			17.5	8.15797	3.90125	6.54368	0.588295	14.7016	1.0024
150	--	--	--	--	--	0.0529349			20	8.11043	3.87994	6.55288	0.594501	14.6633	1.00237
170	--	--	--	--	--	0.0649723			22.5	8.03635	3.87289	6.58742	0.576069	14.6238	0.996936
190	--	--	--	--	--	0.0760656			25	8.04652	3.85572	6.57004	0.606351	14.6166	0.989672
210	--	--	--	--	--	0.0888481			27.5	8.02441	3.84279	6.58544	0.57293	14.6099	0.986534
230	--	--	--	--	--	0.101519			30	7.99482	3.84472	6.58528	0.585566	14.5801	0.983557
250	--	--	--	--	--	0.114744			32.5	7.97071	3.8369	6.62055	0.605529	14.5913	0.983843
270	--	--	--	--	--	0.129218			35	7.97439	3.82988	6.60675	0.567637	14.5811	0.983803
290	--	--	--	--	--	0.144969			37.5	7.96921	3.81001	6.60446	0.580128	14.5737	0.989612
310	9.35975	4.62851	7.71352	0.874977	17.0733	0.163529			40	7.93655	3.81856	6.61866	0.582611	14.5552	0.990869
330	9.33433	4.55145	7.72041	0.912938	17.0547	0.182979			42.5	7.95152	3.79	6.60933	0.585616	14.5608	0.98833
350	9.35275	4.52564	7.68168	0.896926	17.0344	0.204095			45	7.9032	3.78429	6.62073	0.60297	14.5239	0.983363
370	9.44767	4.48371	7.66349	0.833996	17.1112	0.223956			47.5	7.91298	3.76502	6.62274	0.604135	14.5357	0.980922
390	9.40579	4.49531	7.67053	0.825457	17.0763	0.252866			50	7.90218	3.79053	6.63996	0.615097	14.5421	0.976072
410	9.39694	4.45316	7.6851	0.785587	17.082	0.275405			55	7.89006	3.78475	6.63741	0.607082	14.5275	0.980072
430	9.4035	4.44702	7.69547	0.803115	17.099	0.303309			60	7.86163	3.7642	6.64909	0.62222	14.5107	0.988199
450	9.43709	4.38509	7.65221	0.773909	17.0893	0.329822			65	7.84219	3.77125	6.65997	0.605824	14.5022	0.991219
470	9.3946	4.41819	7.70693	0.774369	17.1015	0.359519			70	7.84008	3.77069	6.65746	0.60541	14.4975	0.987821
490	9.39382	4.38521	7.68164	0.761075	17.0755	0.385835			75	7.82797	3.76157	6.67734	0.592855	14.5053	0.98212
510	9.38346	4.38304	7.70988	0.802358	17.0933	0.416619			80	7.81427	3.74872	6.68565	0.589934	14.4999	0.986614
530	9.37378	4.36722	7.69829	0.778733	17.0721	0.446491			85	7.80875	3.72941	6.66908	0.588739	14.4778	0.989688
550	9.35563	4.34303	7.7078	0.769398	17.0634	0.470723			90	7.80255	3.74623	6.68385	0.604183	14.4864	0.99383
570	9.45951	4.35064	7.67401	0.764819	17.1335	0.503159			95	7.77341	3.7337	6.69281	0.587166	14.4662	0.983424
590	9.39057	4.35743	7.71264	0.744003	17.1032	0.540133			100	7.75953	3.74343	6.70226	0.627235	14.4618	0.990031
610	9.45401	4.32004	7.68017	0.781632	17.1342	0.56378			105	7.77502	3.71916	6.7064	0.63217	14.4814	0.998359
640	9.4395	4.33135	7.70149	0.749552	17.141	0.609909			110	7.76879	3.72657	6.70276	0.585979	14.4716	0.999637
670	9.37757	4.31332	7.74798	0.775665	17.1255	0.656173			115	7.7992	3.73183	6.69731	0.580645	14.4965	0.990779
700	9.42318	4.30451	7.72023	0.735636	17.1434	0.700546			120	7.76902	3.72144	6.71303	0.60139	14.482	0.986162
730	9.37646	4.30653	7.75554	0.7421	17.132	0.742503			125	7.79407	3.71791	6.69936	0.61517	14.4934	0.990508
760	9.40749	4.31417	7.74813	0.739451	17.1556	0.764647			130	7.74388	3.7225	6.71982	0.617811	14.4637	0.999769
790	9.43052	4.32374	7.75661	0.706304	17.1871	0.786279			135	7.74802	3.71254	6.71398	0.616644	14.462	0.992674
820	9.40015	4.29697	7.75196	0.696161	17.1521	0.824975			140	7.72892	3.6924	6.73037	0.618957	14.4593	0.989306
850	9.3826	4.29563	7.77005	0.705056	17.1527	0.840872			155	7.73453	3.70332	6.72851	0.617855	14.463	0.98444
880	9.41082	4.27866	7.76683	0.720709	17.1776	0.866261			160	7.72709	3.68793	6.7278	0.61816	14.4549	0.991453
910	9.36391	4.29048	7.78609	0.732759	17.15	0.886376			170	7.70987	3.69055	6.74011	0.624931	14.45	0.996273
940	9.40247	4.28629	7.77836	0.7012	17.1808	0.916943			180	7.72105	3.69071	6.73804	0.608257	14.4591	0.993368
970	9.38212	4.27469	7.79089	0.717674	17.173	0.915819			190	7.69918	3.69614	6.74118	0.6074	14.4404	1.00364
1000	9.32906	4.27216	7.81527	0.747387	17.1443	0.932327			200	7.71128	3.6974	6.74837	0.616151	14.4597	0.993909
1030	9.35201	4.27992	7.82039	0.724862	17.1724	0.949473			210	7.66544	3.69245	6.77126	0.624799	14.4367	1.00491
1060	9.31648	4.2785	7.82732	0.72087	17.1438	0.959331			220	7.6724	3.67506	6.7575	0.631587	14.4299	0.998292
1100	9.34233	4.28183	7.83132	0.69351	17.1737	0.977709			230	7.66804	3.69644	6.75853	0.614923	14.4266	1.00381
1140	9.3249	4.27996	7.84109	0.722531	17.166	0.989715			240	7.65845	3.67618	6.76888	0.621077	14.4273	0.998487
1200	9.27073	4.2628	7.86292	0.714524	17.1337	0.992049			250	7.64731	3.663	6.77643	0.615263	14.4237	1.00203
1240	9.26748	4.25968	7.8727	0.726579	17.1402	1.0035			260	7.64399	3.68324	6.77662	0.62152	14.4206	1.00311
1280	9.25344	4.25059	7.87612	0.744018	17.1296	1.00408			270	7.66236	3.67381	6.78273	0.63413	14.4451	1.00502
1320	9.24044	4.23307	7.89311	0.745759	17.1336	1.00607			280	7.62276	3.66801	6.78603	0.642384	14.4088	1.00786
1360	9.23719	4.23178	7.87709	0.733806	17.1143	1.00121			290	7.61158	3.68581	6.79098	0.624516	14.4026	1.00129
1400	9.24511	4.2431	7.89146	0.715339	17.1366	1.00055			300	7.62568	3.67156	6.78927	0.606852	14.4149	1.0066
1440	9.21839	4.23648	7.89597	0.727772	17.1144	0.999994			310	7.60838	3.66833	6.79607	0.6241	14.4045	1.00157
1480	9.20137	4.23264	7.89972	0.718998	17.1011	0.996006			340	7.62508	3.66942	6.81343	0.628814	14.4385	1.0585
1520	9.15752	4.22104	7.92155	0.759231	17.0791	0.99629			370	7.63758	3.675	6.81791	0.628617	14.4555	1.06292
1560	9.16074	4.22033	7.91746	0.72332	17.0782	0.994495			400	7.60196	3.67601	6.83328	0.622837	14.4352	1.07682
1600	9.13314	4.21715	7.9243	0.738435	17.0574	0.998347			430	7.61544	3.66774	6.83888	0.631427	14.4543	1.07669
1640	9.13706	4.22544	7.93116	0.736687	17.0682	1.0072			460	7.59471	3.67118	6.85292	0.638292	14.4476	1.0823
1680	9.15147	4.21737	7.92891	0.73296	17.0804	1.00541			490	7.56961	3.66206	6.85951	0.652691	14.4291	1.08442
1730	9.12557	4.21578	7.93322	0.722751	17.0588	1.00071			520	7.57809	3.64964	6.86368	0.646912	14.4418	1.08575
1780	9.12914	4.19473	7.9415	0.731415	17.0706	0.990427			550	7.55272	3.6448	6.87674	0.649339	14.4295	1.08394
1830	9.126	4.21192	7.9437	0.719431	17.0697	0.988658			580	7.54947	3.64895	6.87638	0.661961	14.4258	1.08504
1880	9.10862	4.20045	7.95836	0.728209	17.067	0.990054			610	7.55627	3.6371	6.87642	0.648147	14.4327	1.07938
1930	9.12113	4.19754	7.95137	0.730507	17.0725	0.99537			640	7.55162	3.64875	6.88307	0.632262	14.4347	1.08291
1980	9.08396	4.19818	7.9629	0.740892	17.0469	1.00404			670	7.53668	3.6338	6.89087	0.657855	14.4275	1.0852
2030	9.09424	4.1856	7.95989	0.737752	17.0541	1.00246			700	7.54839	3.63194	6.88665	0.651174	14.435	1.08482
2080	9.08429	4.17925	7.9682	0.745645	17.0525	1.01306			730	7.53893	3.64743	6.89389	0.655416	14.4328	1.08389
2130	9.05987	4.21472	7.97476	0.720656	17.0346	1.0078			760	7.53713	3.64532	6.89883	0.657275	14.436	1.08705
2180	9.05992	4.20073	7.97293	0.710184	17.0329	1.01568			800	7.53837	3.62918	6.90303	0.660983	14.4414	1.09093
2230	9.0466	4.2075	7.98576	0.739633	17.0324	1.01398			840	7.51309	3.62522	6.91485	0.660283	14.4279	1.09135
2280	9.07226	4.18706	7.98095	0.75295	17.0532	1.01768			880	7.5142	3.63256	6.91216	0.647256	14.4264	1.09243
2330	9.06092	4.18459	7.97385	0.736978	17.0348	1.0096			920	7.55182	3.63866	6.90835	0.649436	14.4602	1.09404
2380	9.02931	4.18425	7.99357	0.752954	17.0229	1.01765			960	7.5236	3.6304	6.92473	0.643094	14.4483	1.09391
2430	9.04764	4.15067	7.97812	0.747595	17.0258	1.00862			1000	7.50614	3.61475	6.92032	0.670377	14.4265	1.09224
2500	9.02305	4.18223	7.99179	0.713728	17.0148	1.021			1040	7.47509	3.60946	6.92785	0.672223	14.4029	1.08605
2570	8.99905	4.18245	8.0133	0.736143	17.0123	1.02529			1080	7.47336	3.59619	6.93423	0.680158	14.4076	1.08625
2640	9.02428	4.18422	8.00697	0.731516	17.0313	1.03396			1120	7.48059	3.60333	6.92897	0.658414	14.4096	1.08392
2710	8.98168	4.17496	8.01401	0.749692	16.9957	1.04452			1160	7.44283	3.60403	6.93945	0.662089	14.3823	1.08917
2780	9.01306	4.16224	8.00906	0.735684	17.0221	1.04403			1200	7.44619	3.58136	6.93591	0.681885	14.3821	1.08444
2850	8.99901	4.14787	8.02319	0.760629	17.0222	1.0475			1240	7.43036	3.5924	6.94308	0.673199	14.3734	1.09008
2920	8.97352	4.15878	8.03116	0.746534	17.0047	1.0435			1280	7.43657	3.58968	6.94714	0.680683	14.3837	1.09219
3090	8.98063	4.17313	8.01535	0.73117	16.996	1.04477			1320	7.43579	3.59184	6.95446	0.673275	14.3903	1.08511
3160	8.918	4.16564	8.03903	0.747845	16.957	1.01918			1360	7.41989	3.59604	6.95698	0.677116	14.3769	1.09122
3230	8.94521	4.14662	8.02728	0.737407	16.9725	0.989917			1410	7.44004	3.61385	6.95479	0.651187	14.3948	1.09618
3300	8.93317	4.16157	8.03292	0.748135	16.9661	0.997795			1460	7.41979	3.60182	6.96458	0.670045	14.3844	1.09586
3370	8.89914	4.14725	8.03591	0.742687	16.935	0.993057			1510	7.4274	3.59231	6.96544	0.658694	14.3928	1.094
3440	8.95146	4.14804	8.04087	0.747564	16.9923	1.01564			1560	7.43054	3.58747	6.9662	0.673337	14.3967	1.09503
3510	8.93169	4.15105	8.043	0.763379	16.9747	1.02342			1610	7.4124	3.59898	6.97545	0.668407	14.3878	1.09115
3630	8.93329	4.13938	8.04543	0.750135	16.9787	1.02992			1660	7.43814	3.59673	6.97434	0.679108	14.4125	1.09719
3760	8.90817	4.14918	8.0585	0.759071	16.9667	1.04311			1710	7.41584	3.57287	6.97045	0.694557	14.3863	1.09335
3890	8.86201	4.13436	8.07746	0.762178	16.9395	1.04634			1760	7.4063	3.58432	6.97758	0.684677	14.3839	1.10159
4020	8.89052	4.1451	8.07444	0.73722	16.965	1.04074			1810	7.42193	3.58445	6.97741	0.674818	14.3993	1.09464
4150	8.87716	4.12889	8.06623	0.753135	16.9434	1.04469			1860	7.39918	3.57165	6.98501	0.683948	14.3842	1.0999
4280	8.89086	4.13581	8.07485	0.771471	16.9657	1.0588			1910	7.39188	3.56952	6.9864	0.676212	14.3783	1.10188
4410	8.88363	4.12639	8.08538	0.75899	16.969	1.04783			1960	7.37972	3.57589	6.98568	0.686542	14.3654	1.09917
4540	8.89349	4.12686	8.08083	0.767218	16.9743	1.04912			2010	7.37778	3.55349	6.99459	0.71014	14.3724	1.10042
4670	8.86642	4.12918	8.08361	0.759768	16.95	1.00649			2060	7.37385	3.56112	6.9953	0.677615	14.3692	1.10007
4800	8.84046	4.12111	8.0854	0.77048	16.9259	0.997002			2110	7.33285	3.55535	7.00743	0.71839	14.3403	1.10087
4930	8.83208	4.1334	8.1054	0.744463	16.9375	1.02012			2180	7.36632	3.56253	6.99619	0.700497	14.3625	1.10542
5060	8.84308	4.12942	8.10351	0.759255	16.9466	1.0271			2250	7.35285	3.56094	7.00438	0.697	14.3572	1.10406
5190	8.84151	4.13516	8.09376	0.748393	16.9353	1.02986			2320	7.35658	3.57243	7.00817	0.675632	14.3648	1.10232
5320	8.81523	4.13568	8.11153	0.755768	16.9268	1.04054			2390	7.34446	3.5572	7.01987	0.690752	14.3643	1.10478
5450	8.83065	4.12374	8.10085	0.766836	16.9315	1.04183			2460	7.35002	3.54421	7.00995	0.705456	14.36	1.10132
5580	8.8149	4.13678	8.11778	0.760979	16.9327	1.02598			2530	7.36092	3.5488	7.01711	0.715498	14.378	1.10279
									2600	7.36552	3.55244	7.01227	0.692954	14.3778	1.10253
									2670	7.33503	3.53016	7.02253	0.721791	14.3576	1.10569
									2740	7.31872	3.53735	7.01783	0.704402	14.3366	1.1014
									2810	7.32784	3.54316	7.02909	0.699468	14.3569	1.10499
									2880	7.34464	3.54019	7.02582	0.704303	14.3705	1.10561
									2950	7.34615	3.54273	7.0251	0.704719	14.3713	1.10396
									3020	7.32062	3.55346	7.02912	0.690803	14.3497	1.10675
									3090	7.34554	3.54137	7.03213	0.705684	14.3777	1.10942
									3160	7.34929	3.53337	7.02868	0.709563	14.378	1.10293
									3290	7.34607	3.527	7.03592	0.71062	14.382	1.10374
									3420	7.31903	3.52312	7.0495	0.69821	14.3685	1.10911
									3550	7.29182	3.53427	7.0557	0.710764	14.3475	1.11195
									3680	7.31507	3.51386	7.05718	0.724992	14.3723	1.11337
									3810	7.26789	3.5269	7.07765	0.713024	14.3455	1.11284
									3940	7.2831	3.50331	7.0626	0.727527	14.3457	1.11269
									4070	7.28952	3.51733	7.06461	0.717526	14.3541	1.11109
									4200	7.2721	3.51408	7.07327	0.733897	14.3454	1.11295
									4330	7.30594	3.5268	7.06656	0.715694	14.3725	1.11158
									4460	7.27765	3.51948	7.0725	0.736385	14.3502	1.11171
									4590	7.27418	3.52126	7.07107	0.730273	14.3453	1.11325
									4720	7.26824	3.53123	7.08449	0.709395	14.3527	1.12001
									4850	7.28152	3.52532	7.07933	0.719463	14.3608	1.11927
									4980	7.27884	3.52044	7.07976	0.730895	14.3586	1.11469
									5110	7.28797	3.52376	7.07888	0.724316	14.3668	1.11393

## Sheet: POM SAXS-data-Figure 3
sample: POM130 at Tc=168°C (Figure 3)									sample: POM130 at Tc=155°C (Figure 3)
time t	amorph. thickness da	distribution of da	crystalline. thickness dc	distribution of dc	longperiod L	normalized Porod-Parameter P			time t	amorph. thickness da	distribution of da	crystalline. thickness dc	distribution of dc	longperiod L	normalized Porod-Parameter P
min	nm	nm	nm	nm	nm	normalized to 2.36135			min	nm	nm	nm	nm	nm	normalized to 2.45887
10	--	--	--	--	--	0.0208477			2	7.84171	4.23955	10.1247	1.68662	17.9664	0.46653
20	--	--	--	--	--	0.0203091			4	7.49601	3.61936	10.4381	1.86686	17.934	0.9531
30	--	--	--	--	--	0.0192349			6	7.114	3.4417	10.685	1.93209	17.799	1.00347
40	--	--	--	--	--	0.0176641			8	6.99483	3.28303	10.7486	1.99354	17.7434	0.99508
50	--	--	--	--	--	0.0200949			10	6.84593	3.1859	10.8595	2.02741	17.7054	1
60	--	--	--	--	--	0.020278			12	6.72885	3.16744	10.9224	2.05243	17.6512	1.02052
70	--	--	--	--	--	0.0215728			14	6.65811	3.10558	10.9587	2.05678	17.6168	1.0172
80	--	--	--	--	--	0.0275441			16	6.58581	3.05353	11.0288	2.06831	17.6146	1.01678
90	--	--	--	--	--	0.0330136			18	6.53472	3.03494	11.0558	2.09157	17.5906	1.0213
100	--	--	--	--	--	0.040259			20	6.46865	3.0127	11.0708	2.08593	17.5394	1.02527
110	--	--	--	--	--	0.0473036			22	6.4595	2.96699	11.0958	2.11998	17.5553	1.02013
120	--	--	--	--	--	0.0612066			24	6.41803	2.91301	11.1348	2.13875	17.5529	1.01395
130	--	--	--	--	--	0.0740278			26	6.40081	2.90285	11.1195	2.14698	17.5203	1.00787
140	--	--	--	--	--	0.0867096			28	6.40934	2.85088	11.1289	2.17117	17.5383	0.99763
150	--	--	--	--	--	0.104694			30	6.35303	2.87732	11.1678	2.1452	17.5209	1.00416
180	--	--	--	--	--	0.136577			32	6.27388	2.85895	11.2284	2.17635	17.5023	1.02026
210	--	--	--	--	--	0.175443			34	6.20085	2.86181	11.2753	2.17762	17.4762	1.03222
240	--	--	--	--	--	0.217936			36	6.27993	2.80572	11.2255	2.16966	17.5054	1.00934
270	--	--	--	--	--	0.263462			38	6.17122	2.8059	11.3221	2.17301	17.4933	1.02701
300	--	--	--	--	--	0.321903			40	6.20261	2.77485	11.293	2.18584	17.4956	1.01763
330	--	--	--	--	--	0.375288			42	6.09914	2.81519	11.3551	2.18392	17.4542	1.04456
360	7.27158	3.35697	15.755	3.14725	23.0265	0.435412			44	6.18047	2.73193	11.307	2.21925	17.4875	1.01939
390	7.20593	3.25245	15.7843	3.16215	22.9902	0.484318			46	6.12282	2.74256	11.3487	2.21502	17.4716	1.02492
420	7.13091	3.17667	15.8184	3.1791	22.9493	0.535015			48	6.13493	2.7034	11.3392	2.20532	17.4741	1.01181
450	7.08587	3.12232	15.8505	3.18305	22.9364	0.600122			50	6.07946	2.69221	11.3739	2.22014	17.4533	1.01928
480	7.03324	3.03919	15.8808	3.19839	22.9141	0.646968			52	6.08065	2.67054	11.3891	2.23339	17.4697	1.01433
510	6.99056	2.97625	15.879	3.2013	22.8696	0.692302			54	6.02966	2.70905	11.392	2.21684	17.4217	1.02517
540	6.9227	2.92459	15.9563	3.22188	22.879	0.745418			56	6.06525	2.67997	11.391	2.24534	17.4563	1.01626
570	6.86614	2.86058	15.982	3.24494	22.8482	0.775822			58	6.03772	2.68611	11.4035	2.23632	17.4412	1.02105
600	6.79988	2.80018	16.0172	3.2557	22.8171	0.805987			60	6.03328	2.67371	11.4282	2.25834	17.4614	1.02753
630	6.71133	2.7522	16.1211	3.28001	22.8324	0.847271			65	5.96548	2.65995	11.4722	2.23634	17.4377	1.03438
670	6.64032	2.70229	16.1671	3.29789	22.8074	0.877654			70	5.95356	2.58271	11.4996	2.25001	17.4532	1.01953
710	6.54354	2.62708	16.2581	3.32075	22.8016	0.894531			75	5.91392	2.59854	11.5205	2.25759	17.4344	1.02104
750	6.45526	2.58294	16.3194	3.32343	22.7747	0.906925			80	5.8535	2.57727	11.5627	2.25426	17.4162	1.02938
790	6.37825	2.52012	16.4143	3.35429	22.7926	0.929623			85	5.86254	2.5538	11.5652	2.27422	17.4277	1.02949
830	6.30613	2.49917	16.4806	3.36255	22.7868	0.9391			90	5.82463	2.53065	11.5879	2.2769	17.4125	1.02924
870	6.24391	2.45787	16.5288	3.38326	22.7728	0.958962			95	5.76551	2.53211	11.6154	2.26451	17.381	1.03262
910	6.16433	2.39376	16.6215	3.39508	22.7859	0.963227			100	5.74417	2.4874	11.6572	2.29046	17.4014	1.02804
950	6.08909	2.36545	16.6831	3.40368	22.7722	0.965652			105	5.74722	2.45481	11.6766	2.30962	17.4239	1.02878
990	6.01912	2.3212	16.7588	3.41367	22.7779	0.974932			110	5.70293	2.47465	11.7063	2.30093	17.4092	1.0451
1030	5.94043	2.29258	16.8372	3.42586	22.7776	0.98365			115	5.71182	2.43396	11.7032	2.3195	17.4151	1.03147
1070	5.87852	2.24426	16.8818	3.42699	22.7603	0.985102			120	5.66665	2.4502	11.724	2.31435	17.3906	1.03685
1110	5.82215	2.20722	16.9463	3.43813	22.7685	0.995659			125	5.64562	2.43119	11.7508	2.31186	17.3965	1.04423
1150	5.77295	2.18729	17.0048	3.4501	22.7778	0.993638			130	5.62324	2.41695	11.7714	2.32656	17.3946	1.04712
1190	5.71168	2.14149	17.0707	3.45228	22.7824	0.999999			135	5.59253	2.37335	11.7951	2.33879	17.3877	1.04511
1240	5.64239	2.10716	17.1324	3.4604	22.7748	1.00265			140	5.57941	2.3595	11.7974	2.33491	17.3768	1.03841
1290	5.58213	2.08391	17.1978	3.4625	22.78	1.003			145	5.54213	2.34252	11.8312	2.33527	17.3733	1.04309
1340	5.53028	2.05426	17.2527	3.47564	22.7829	1.0028			150	5.53183	2.30231	11.8563	2.36452	17.3881	1.04406
1390	5.47472	2.01388	17.3072	3.46176	22.7819	1.00002			155	5.52717	2.31081	11.8526	2.3645	17.3798	1.04064
1440	5.42174	2.00151	17.3779	3.47613	22.7996	1.02225			160	5.46639	2.29982	11.8992	2.35497	17.3656	1.04242
1490	5.36896	1.96938	17.4013	3.48911	22.7703	1.01091			170	5.46949	2.27949	11.9034	2.37964	17.3728	1.03707
1540	5.32578	1.95595	17.4519	3.48763	22.7777	1.02681			180	5.41644	2.2703	11.9423	2.38305	17.3587	1.04456
1590	5.28853	1.93265	17.4938	3.47496	22.7823	1.02143			190	5.38685	2.23851	11.9714	2.3983	17.3583	1.04184
1640	5.23159	1.90604	17.534	3.47574	22.7656	1.02691			200	5.33754	2.2526	12.0016	2.38559	17.3392	1.05724
1690	5.20398	1.88105	17.5992	3.48019	22.8032	1.03662			210	5.30121	2.19998	12.038	2.413	17.3392	1.05174
1740	5.16604	1.87122	17.6401	3.48394	22.8061	1.05005			220	5.28561	2.18689	12.0447	2.41728	17.3303	1.05723
1790	5.13345	1.8545	17.666	3.50068	22.7994	1.05591			230	5.24485	2.15445	12.0819	2.42602	17.3268	1.05007
1840	5.08391	1.83687	17.7128	3.48062	22.7967	1.06019			240	5.19034	2.15848	12.1167	2.41689	17.3071	1.05923
1890	5.0505	1.8113	17.7555	3.4851	22.806	1.06207			250	5.17565	2.13315	12.145	2.43559	17.3207	1.05216
1940	5.00193	1.81031	17.7936	3.47828	22.7955	1.07171			260	5.15268	2.1109	12.1711	2.45201	17.3237	1.05674
2010	4.96054	1.78719	17.821	3.4738	22.7815	1.06876			270	5.12463	2.09124	12.1776	2.455	17.3023	1.05402
2080	4.91243	1.77209	17.8801	3.48321	22.7925	1.0802			280	5.09045	2.07115	12.2175	2.46089	17.3079	1.05752
2150	4.89844	1.76194	17.9024	3.46827	22.8009	1.08916			290	5.06263	2.05965	12.2343	2.46143	17.2969	1.05642
2220	4.85515	1.75181	17.9253	3.46862	22.7805	1.09758			300	5.0085	2.09001	12.2642	2.44377	17.2727	1.07664
2290	4.83579	1.73863	17.9659	3.45822	22.8017	1.10328			310	5.00576	2.0189	12.272	2.47143	17.2777	1.06095
2360	4.79763	1.72219	17.9946	3.45543	22.7923	1.10624			340	4.98405	2.0106	12.345	2.49286	17.3291	1.10685
2430	4.76315	1.70705	18.0255	3.46138	22.7887	1.10707			370	4.96246	2.00494	12.3684	2.48082	17.3309	1.11766
2500	4.73356	1.69935	18.0265	3.45627	22.76	1.1093			400	4.94484	1.99947	12.3978	2.49769	17.3426	1.12381
2570	4.70324	1.67893	18.069	3.44418	22.7722	1.10891			430	4.90781	2.01163	12.4312	2.48852	17.339	1.13518
2640	4.66827	1.66857	18.0793	3.44592	22.7476	1.10726			460	4.91854	1.95451	12.4488	2.51187	17.3674	1.12319
2710	4.63879	1.65831	18.1205	3.45597	22.7593	1.10602			490	4.89613	1.94613	12.4731	2.5201	17.3692	1.13126
2780	4.62175	1.65849	18.1239	3.42975	22.7456	1.10857			520	4.85728	1.92829	12.4964	2.50917	17.3537	1.13243
2850	4.60541	1.63909	18.128	3.44195	22.7334	1.1043			550	4.83625	1.94292	12.5206	2.51354	17.3568	1.14008
2920	4.57523	1.62684	18.1713	3.43602	22.7465	1.10985			580	4.82586	1.91925	12.5409	2.54108	17.3668	1.14032
2990	4.55198	1.61293	18.1919	3.43396	22.7439	1.11518			610	4.80234	1.88492	12.5662	2.54247	17.3686	1.13987
3120	4.52119	1.60354	18.2	3.42976	22.7212	1.12601			640	4.771	1.88142	12.5956	2.53866	17.3666	1.1426
3250	4.49844	1.59865	18.2258	3.42208	22.7242	1.13124			670	4.72026	1.94157	12.6143	2.51559	17.3346	1.16705
3380	4.47516	1.57699	18.2521	3.43771	22.7272	1.14178			700	4.71439	1.90376	12.6317	2.53215	17.346	1.15655
3510	4.44296	1.57102	18.2811	3.40319	22.724	1.13429			730	4.68649	1.8697	12.6544	2.5317	17.3409	1.15866
3640	4.41641	1.55312	18.2788	3.41034	22.6952	1.14702			760	4.68378	1.84766	12.6692	2.55446	17.3529	1.15398
3770	4.39895	1.54928	18.2909	3.39449	22.6899	1.13565			800	4.66735	1.8324	12.6899	2.55564	17.3573	1.15642
3900	4.37496	1.54606	18.3203	3.41682	22.6952	1.1478			840	4.63166	1.8525	12.7041	2.54086	17.3357	1.16856
4030	4.35021	1.53307	18.3179	3.40505	22.6681	1.14797			880	4.64068	1.79305	12.7266	2.56663	17.3673	1.15801
4160	4.33598	1.51371	18.3286	3.3996	22.6646	1.14149			920	4.61613	1.77736	12.7423	2.56915	17.3584	1.15902
4290	4.31572	1.50685	18.3562	3.37974	22.6719	1.14699			960	4.58146	1.78668	12.7647	2.5611	17.3462	1.16703
4420	4.29824	1.51033	18.3394	3.40087	22.6377	1.14535			1000	4.56151	1.78611	12.773	2.56207	17.3345	1.16961
4550	4.27601	1.49695	18.3867	3.38588	22.6627	1.15998			1040	4.53788	1.80625	12.7855	2.54533	17.3234	1.17473
4680	4.25917	1.48959	18.3571	3.38583	22.6162	1.15651			1080	4.5428	1.74913	12.7859	2.58109	17.3287	1.16414
4810	4.24668	1.48764	18.3628	3.38506	22.6095	1.16501			1120	4.52173	1.75845	12.8103	2.5742	17.3321	1.17466
4940	4.22194	1.47728	18.3865	3.3626	22.6085	1.17283			1160	4.52178	1.72377	12.8106	2.57977	17.3324	1.16759
									1200	4.51312	1.72312	12.829	2.57956	17.3421	1.16603
									1240	4.49928	1.72408	12.8255	2.58183	17.3248	1.17099
									1280	4.47655	1.72963	12.8401	2.56979	17.3167	1.17741
									1320	4.46155	1.7233	12.8564	2.57069	17.3179	1.17921
									1360	4.47347	1.69362	12.866	2.58274	17.3394	1.17475
									1410	4.44569	1.72208	12.8835	2.58598	17.3292	1.18579
									1460	4.42467	1.7279	12.8802	2.56521	17.3048	1.18969
									1510	4.414	1.71583	12.9138	2.58141	17.3278	1.18703
									1560	4.37987	1.72868	12.9166	2.55847	17.2964	1.1933
									1610	4.3973	1.66578	12.9213	2.58824	17.3186	1.17639
									1660	4.38493	1.65911	12.9307	2.59135	17.3156	1.1753
									1710	4.3406	1.70517	12.9448	2.57242	17.2854	1.19719
									1760	4.34654	1.66998	12.9451	2.58017	17.2916	1.18968
									1810	4.34027	1.64779	12.9607	2.58935	17.301	1.18368
									1860	4.33148	1.64342	12.9685	2.59108	17.3	1.18861
									1910	4.29591	1.63481	13.0023	2.59538	17.2982	1.18831
									1960	4.27217	1.65252	12.9999	2.57449	17.2721	1.19991
									2010	4.28265	1.61587	12.9948	2.58002	17.2775	1.18431
									2060	4.26436	1.63449	13.009	2.59095	17.2733	1.19692
									2110	4.24096	1.64296	13.0386	2.57703	17.2796	1.19863
									2180	4.22791	1.62855	13.0418	2.58328	17.2697	1.20424
									2250	4.2231	1.60183	13.0539	2.58742	17.277	1.19359
									2320	4.20825	1.59559	13.0523	2.58789	17.2606	1.19801
									2390	4.18866	1.63401	13.059	2.57426	17.2477	1.20996
									2460	4.16668	1.61269	13.0763	2.56563	17.243	1.20768
									2530	4.14591	1.63684	13.0668	2.5536	17.2127	1.21515
									2600	4.1774	1.56316	13.0517	2.58493	17.2291	1.19205
									2670	4.13768	1.60191	13.0813	2.57411	17.219	1.20701
									2740	4.12864	1.5854	13.1066	2.57264	17.2352	1.20344
									2810	4.11118	1.56697	13.1093	2.57882	17.2205	1.19806
									2880	4.1106	1.53703	13.114	2.59163	17.2246	1.18888
									2950	4.08482	1.59182	13.117	2.56422	17.2018	1.2177
									3020	4.09382	1.57497	13.115	2.5646	17.2088	1.21628
									3090	4.10222	1.54822	13.1374	2.57336	17.2397	1.2034
									3160	4.08227	1.54081	13.1493	2.5732	17.2315	1.20112
									3290	4.06795	1.54456	13.1472	2.57907	17.2152	1.20392
									3420	4.06458	1.53437	13.1513	2.57406	17.2159	1.20449
									3550	4.02948	1.55397	13.177	2.56222	17.2065	1.21444
									3680	4.04164	1.53254	13.144	2.57286	17.1856	1.20703
									3810	4.04803	1.52021	13.1506	2.56984	17.1986	1.19998
									3940	4.01258	1.53883	13.1659	2.54929	17.1785	1.20932
									4070	4.00082	1.53261	13.1813	2.56554	17.1821	1.21755
									4200	3.98196	1.55555	13.1562	2.54691	17.1382	1.21721
									4330	3.9973	1.53499	13.1998	2.56919	17.1971	1.21631
									4460	3.96169	1.55179	13.1937	2.55657	17.1553	1.22402
									4590	3.99021	1.50804	13.1774	2.56238	17.1676	1.20333
									4720	3.9784	1.50188	13.1776	2.55978	17.156	1.20335
									4850	3.94481	1.53162	13.1889	2.54436	17.1337	1.22058
									4990	3.9172	1.53167	13.2051	2.54358	17.1223	1.22309
									5120	3.93893	1.48679	13.219	2.55487	17.1579	1.20682

## Sheet: PEO SAXS-data-Figure 3
sample: PEO180 at Tc=60°C (Figure 3)									sample: PEO180 at Tc=45°C (Figure 3)
time t	amorph. thickness da	distribution of da	crystalline. thickness dc	distribution of dc	longperiod L	normalized Porod-Parameter P			time t	amorph. thickness da	distribution of da	crystalline. thickness dc	distribution of dc	longperiod L	normalized Porod-Parameter P
min	nm	nm	nm	nm	nm	normalized to 0.18943			min	nm	nm	nm	nm	nm	normalized to 0.1800
10	--	--	--	--	--	0.06995			2	14.0954	4.13692	19.8187	4.61312	33.9141	0.86844
20	--	--	--	--	--	0.06372			4	12.1046	3.11002	21.4434	4.86602	33.548	1.01571
30	--	--	--	--	--	0.07207			6	11.4476	2.75814	22.0263	5.03162	33.4739	1
40	--	--	--	--	--	0.08296			8	10.9991	2.60458	22.391	5.05533	33.39	0.98961
50	--	--	--	--	--	0.11606			10	10.7462	2.50114	22.5964	5.14147	33.3426	0.97419
60	--	--	--	--	--	0.16479			12	10.5338	2.36751	22.7794	5.1865	33.3133	0.95523
70	--	--	--	--	--	0.23141			14	10.425	2.33028	22.815	5.18764	33.24	0.9379
80	--	--	--	--	--	0.3077			16	10.3204	2.30426	22.9244	5.24194	33.2449	0.9218
90	12.6505	4.96445	36.7735	5.26679	49.424	0.39253			18	10.1895	2.28674	23.0221	5.2063	33.2116	0.90634
100	12.5114	4.52801	37.3578	5.33956	49.8692	0.47996			20	10.1416	2.20446	23.1108	5.24179	33.2524	0.89754
110	12.2516	3.97655	37.7651	5.56474	50.0167	0.56326			22	10.0667	2.2262	23.1006	5.24852	33.1673	0.88853
120	12.2003	3.75596	38.1018	5.75078	50.3021	0.64261			24	10.031	2.19718	23.1288	5.24826	33.1598	0.87967
130	12.1282	3.55149	38.3822	5.92114	50.5104	0.72225			26	9.99467	2.21076	23.183	5.26479	33.1776	0.87379
140	11.9739	3.41157	38.6064	5.9776	50.5804	0.78576			28	9.91704	2.16568	23.1761	5.26698	33.0931	0.86466
150	11.8627	3.2259	38.7388	6.02346	50.6016	0.83052			30	9.85775	2.14442	23.2703	5.23993	33.1281	0.86214
180	11.7507	3.08673	39.0359	6.15512	50.7866	0.90006			32	9.85112	2.18711	23.2564	5.26179	33.1075	0.86626
210	11.6533	3.02712	39.2841	6.24528	50.9374	0.9481			34	9.82708	2.2003	23.2948	5.266	33.1219	0.86887
240	11.5812	2.88085	39.5329	6.30591	51.1142	0.9811			36	9.78011	2.18659	23.3204	5.27565	33.1005	0.87373
270	11.5275	2.85689	39.7221	6.38058	51.2496	1.00144			38	9.77921	2.15066	23.359	5.25843	33.1382	0.87042
300	11.4228	2.72299	39.8645	6.47202	51.2873	1.00292			40	9.76478	2.09503	23.3636	5.25527	33.1283	0.87002
330	11.3669	2.7027	39.9517	6.4736	51.3186	1.00001			42	9.74277	2.11424	23.3524	5.24235	33.0952	0.86906
360	11.3189	2.70909	39.8855	6.49372	51.2045	1.00402			44	9.75067	2.15404	23.3353	5.25801	33.086	0.86513
390	11.2659	2.66917	40.0566	6.5226	51.3225	1.00729			46	9.68174	2.11427	23.4311	5.30439	33.1129	0.85874
420	11.2695	2.65141	40.17	6.50079	51.4395	1.01279			48	9.65544	2.10789	23.4259	5.24945	33.0813	0.85492
450	11.2197	2.6781	40.1571	6.50023	51.3768	1.00896			50	9.68885	2.17309	23.3856	5.28003	33.0745	0.85355
480	11.2065	2.6473	40.2107	6.59724	51.4172	1.01379			55	9.67647	2.07375	23.4415	5.27656	33.118	0.85075
510	11.1951	2.60251	40.2107	6.56655	51.4058	1.01205			60	9.60882	2.10014	23.4704	5.25302	33.0792	0.85245
540	11.1533	2.64556	40.2431	6.52996	51.3964	1.01542			65	9.62109	2.145	23.445	5.26048	33.0661	0.84871
570	11.1357	2.63687	40.2183	6.5351	51.354	1.01323			70	9.58302	2.09899	23.4897	5.25903	33.0727	0.84978
600	11.0797	2.56306	40.3167	6.48897	51.3964	1.01327			75	9.5553	2.09133	23.5294	5.25787	33.0847	0.84754
630	11.0916	2.62253	40.4104	6.55191	51.502	1.02204			80	9.5167	2.07076	23.5688	5.23937	33.0855	0.85778
670	11.1152	2.62724	40.3989	6.53698	51.5141	1.01991			85	9.5255	2.05031	23.602	5.26197	33.1275	0.86049
710	11.0622	2.63349	40.4985	6.4661	51.5606	1.02825			90	9.5038	2.08008	23.5887	5.26907	33.0925	0.85756
750	11.0542	2.61635	40.4532	6.52889	51.5074	1.02541			95	9.49959	2.0883	23.5991	5.26579	33.0987	0.84859
790	11.034	2.66575	40.5396	6.48856	51.5736	1.02543			100	9.46604	2.0381	23.6187	5.25387	33.0847	0.84433
830	11.0119	2.61933	40.4647	6.54924	51.4765	1.0303			105	9.45785	2.05727	23.6051	5.22411	33.063	0.84323
870	10.9936	2.59871	40.6068	6.57787	51.6004	1.02854			110	9.45649	2.04825	23.6266	5.26831	33.0831	0.84223
910	10.9992	2.6734	40.6588	6.56931	51.658	1.02873			115	9.44157	2.07945	23.662	5.27622	33.1035	0.84942
950	10.9734	2.56005	40.6546	6.5604	51.628	1.03051			120	9.4279	2.05175	23.6931	5.28174	33.121	0.8504
990	10.943	2.59992	40.6773	6.58815	51.6203	1.02918			125	9.42334	2.03243	23.6161	5.24078	33.0395	0.84257
1030	10.9512	2.55125	40.7161	6.64569	51.6673	1.02635			130	9.42065	2.0475	23.6746	5.2613	33.0952	0.85193
1070	10.916	2.54278	40.6844	6.59571	51.6003	1.03246			135	9.41162	2.05871	23.7032	5.27757	33.1148	0.86502
1110	10.9133	2.62567	40.7102	6.5743	51.6235	1.03052			140	9.42173	2.07521	23.673	5.29198	33.0947	0.86
1150	10.9019	2.56864	40.8043	6.556	51.7062	1.02721			145	9.39707	2.04746	23.7162	5.28454	33.1133	0.85431
1190	10.8963	2.58488	40.7862	6.48672	51.6825	1.02964			150	9.38369	2.04924	23.733	5.26176	33.1167	0.84779
1240	10.8641	2.59667	40.757	6.5544	51.6211	1.03111			160	9.38825	2.04873	23.7095	5.27445	33.0977	0.84187
1290	10.8825	2.58244	40.7408	6.55407	51.6233	1.02882			170	9.35117	2.02284	23.7302	5.27932	33.0814	0.85293
1340	10.836	2.57905	40.8727	6.59479	51.7087	1.03142			180	9.34627	2.03566	23.759	5.28757	33.1053	0.84559
1390	10.8348	2.56011	40.8467	6.53591	51.6815	1.0324			190	9.32433	2.02404	23.782	5.26869	33.1063	0.84162
1440	10.8516	2.59789	40.9658	6.5273	51.8173	1.02805			200	9.31729	2.04719	23.8031	5.27491	33.1204	0.84561
1490	10.8361	2.6262	40.7773	6.5162	51.6134	1.02594			210	9.29639	2.02571	23.8282	5.2908	33.1246	0.85545
1540	10.8277	2.59739	40.8532	6.4963	51.6809	1.02798			220	9.3004	2.06391	23.7994	5.28939	33.0998	0.84542
1590	10.8066	2.58006	40.9585	6.546	51.7651	1.03128			230	9.29112	2.01533	23.7894	5.28529	33.0805	0.85178
1640	10.792	2.56974	40.9592	6.55108	51.7512	1.03326			240	9.2616	2.03316	23.8377	5.2762	33.0994	0.84914
1690	10.7842	2.59688	40.8957	6.55543	51.6798	1.03399			250	9.25512	2.0237	23.8606	5.28429	33.1157	0.84955
1740	10.7614	2.5864	41.057	6.5715	51.8184	1.03374			260	9.24089	2.01736	23.9121	5.27187	33.153	0.85134
1790	10.7837	2.59728	40.9346	6.55556	51.7183	1.03925			270	9.21386	2.02591	23.8591	5.26687	33.0729	0.84554
1840	10.7467	2.57581	40.9735	6.57874	51.7202	1.03273			280	9.22834	2.02524	23.8566	5.28323	33.0849	0.85322
1890	10.7511	2.57572	40.9325	6.48766	51.6835	1.03293			290	9.20606	2.01754	23.8954	5.24571	33.1014	0.84647
1940	10.7602	2.55905	40.9455	6.5805	51.7058	1.03432			300	9.21493	2.03912	23.893	5.26906	33.108	0.8532
2010	10.7248	2.55075	41.0913	6.62963	51.8161	1.03648			330	9.19364	2.03863	24.0451	5.29641	33.2387	0.9083
2080	10.7448	2.53277	41.1256	6.63392	51.8704	1.03517			360	9.17879	2.05802	24.0622	5.29192	33.2409	0.92941
2150	10.6966	2.52958	41.0758	6.66552	51.7724	1.03479			390	9.16073	2.07879	24.1375	5.29724	33.2982	0.93859
2220	10.6836	2.57231	41.1253	6.58661	51.809	1.03442			420	9.13875	2.05881	24.1489	5.2813	33.2877	0.9475
2290	10.6926	2.55972	40.9659	6.60852	51.6585	1.03682			450	9.12969	2.07465	24.1753	5.30862	33.305	0.95132
2360	10.6823	2.53389	41.1618	6.59389	51.8441	1.03905			480	9.12918	2.0735	24.1871	5.28437	33.3163	0.94905
2430	10.6593	2.53387	41.1957	6.57683	51.855	1.03927			510	9.10381	2.06638	24.2208	5.28226	33.3246	0.94876
2500	10.6588	2.56063	41.1776	6.57511	51.8364	1.03801			540	9.0995	2.05503	24.2503	5.27945	33.3498	0.95192
2570	10.6763	2.59467	41.1164	6.5614	51.7926	1.03819			570	9.08985	2.04683	24.2693	5.2911	33.3592	0.94909
2640	10.6189	2.5232	41.1335	6.57258	51.7524	1.03196			600	9.06638	2.06615	24.3015	5.30536	33.3679	0.95517
2710	10.642	2.60185	41.1799	6.58928	51.8219	1.03091			630	9.0601	2.06487	24.2969	5.30198	33.357	0.94865
2780	10.6119	2.57916	41.0739	6.49833	51.6859	1.02992			660	9.05247	2.05383	24.2987	5.30725	33.3512	0.9491
2850	10.622	2.54774	41.0855	6.56771	51.7075	1.03596			690	9.03736	2.04538	24.3298	5.29596	33.3672	0.95242
2920	10.6019	2.62166	41.1066	6.59564	51.7085	1.04031			720	9.02578	2.0377	24.3337	5.28859	33.3595	0.95397
2990	10.6172	2.59468	41.1497	6.61737	51.7669	1.03558			750	9.0151	2.04799	24.3589	5.30367	33.374	0.9539
3120	10.5841	2.55368	41.246	6.61874	51.8302	1.04611			790	8.99848	2.06287	24.3678	5.3142	33.3663	0.95771
3250	10.5636	2.5687	41.304	6.58005	51.8676	1.0504			830	8.98206	2.04833	24.4261	5.30436	33.4082	0.95644
3380	10.5438	2.55598	41.5111	6.60995	52.0549	1.05322			870	8.97764	2.05968	24.4045	5.31069	33.3821	0.95659
3510	10.5323	2.54265	41.3828	6.60904	51.9151	1.05185			910	8.96019	2.06336	24.4122	5.32029	33.3724	0.95932
3640	10.5222	2.54951	41.3452	6.50015	51.8674	1.05358			950	8.94976	2.04099	24.4306	5.28987	33.3804	0.95931
3770	10.5114	2.57934	41.4199	6.54346	51.9313	1.04816			990	8.94474	2.02344	24.4507	5.29428	33.3954	0.95877
3900	10.5036	2.58446	41.3612	6.53555	51.8648	1.04565			1030	8.92778	2.03356	24.4296	5.30044	33.3573	0.96078
4030	10.4844	2.58864	41.368	6.53433	51.8524	1.04548			1070	8.91264	2.02128	24.467	5.2951	33.3797	0.95947
4160	10.5105	2.56392	41.2607	6.61766	51.7712	1.04292			1110	8.91629	2.04664	24.4853	5.29091	33.4016	0.96092
4290	10.4739	2.53783	41.3322	6.58821	51.806	1.03567			1150	8.88529	2.02115	24.4972	5.30829	33.3825	0.95891
4420	10.4708	2.58546	41.3612	6.62211	51.832	1.0443			1190	8.88892	2.05325	24.4746	5.30492	33.3635	0.96319
4550	10.4616	2.55701	41.3107	6.63125	51.7723	1.04197			1230	8.89473	2.05058	24.4929	5.29822	33.3876	0.9626
4680	10.4445	2.55667	41.3079	6.59535	51.7524	1.04366			1270	8.89383	2.02276	24.5224	5.28686	33.4162	0.96087
4810	10.4526	2.53198	41.4725	6.62124	51.9251	1.04804			1310	8.87756	2.01476	24.5474	5.30009	33.4249	0.96164
4940	10.427	2.53994	41.3244	6.59176	51.7514	1.05198			1350	8.85912	2.01361	24.5236	5.29296	33.3827	0.95972
5070	10.433	2.58204	41.5217	6.68161	51.9547	1.05203			1400	8.85961	2.03111	24.5262	5.28883	33.3858	0.9565
									1450	8.83876	2.01901	24.5636	5.2881	33.4024	0.95933
									1500	8.81569	2.01171	24.5926	5.29852	33.4083	0.96245
									1550	8.82114	2.00955	24.5491	5.29238	33.3702	0.95204
									1600	8.78959	2.01877	24.5968	5.29701	33.3863	0.9538
									1650	8.76753	1.99993	24.5722	5.28084	33.3397	0.951
									1700	8.7771	2.01436	24.6068	5.26679	33.3839	0.9467
									1750	8.77437	2.00193	24.6229	5.29248	33.3972	0.94648
									1800	8.77849	2.01639	24.6186	5.28445	33.3971	0.9553
									1850	8.75859	1.9935	24.643	5.31092	33.4016	0.95381
									1900	8.75438	2.01652	24.676	5.29284	33.4304	0.95585
									1950	8.75193	2.03399	24.656	5.2866	33.4079	0.95248
									2000	8.76716	2.02013	24.65	5.30716	33.4172	0.954
									2050	8.72974	2.02612	24.6756	5.28666	33.4053	0.95488
									2100	8.73116	2.01706	24.684	5.30694	33.4152	0.9541
									2170	8.71475	2.02718	24.6897	5.31989	33.4045	0.96097
									2240	8.7043	2.01187	24.6598	5.32574	33.3641	0.95841
									2310	8.70294	2.01698	24.6866	5.335	33.3895	0.95907
									2380	8.67248	1.99821	24.7189	5.33003	33.3914	0.96239
									2450	8.67815	2.02768	24.7069	5.29029	33.385	0.96246
									2520	8.66209	2.00977	24.7405	5.33655	33.4025	0.96677
									2590	8.66043	2.00042	24.7572	5.32825	33.4177	0.96802
									2660	8.64285	2.02016	24.728	5.32587	33.3708	0.9645
									2730	8.61817	2.00194	24.7891	5.34097	33.4073	0.9652
									2800	8.63378	2.00738	24.8064	5.32833	33.4402	0.96446
									2870	8.63558	2.01425	24.8058	5.31755	33.4414	0.96743
									2940	8.60331	2.01164	24.7908	5.32577	33.3941	0.97065
									3010	8.60113	2.01224	24.7938	5.3202	33.3949	0.9652
									3080	8.59838	2.01549	24.8178	5.30202	33.4162	0.96296
									3150	8.58096	1.99167	24.8524	5.33555	33.4333	0.96654
									3280	8.59227	2.0138	24.8211	5.31744	33.4134	0.96346
									3410	8.58266	1.99575	24.8832	5.33077	33.4659	0.9654
									3540	8.55815	1.99598	24.891	5.33827	33.4492	0.96549
									3670	8.56024	1.9764	24.9215	5.33841	33.4818	0.96716
									3800	8.54988	2.0057	24.9481	5.3307	33.498	0.96922
									3930	8.52473	2.01256	24.8916	5.32368	33.4164	0.97099
									4060	8.53177	2.00767	24.8947	5.30728	33.4265	0.97014
									4190	8.51898	1.99402	24.9414	5.31226	33.4604	0.96842
									4320	8.51217	1.98958	24.9415	5.32307	33.4537	0.96601
									4450	8.5138	1.9973	24.9293	5.30763	33.4431	0.96842
									4580	8.49694	1.98207	24.9873	5.3124	33.4842	0.96224
									4710	8.47622	1.99144	25.0078	5.29292	33.484	0.96273
									4840	8.48676	1.99596	25.0095	5.31028	33.4963	0.96389
									4970	8.45324	1.9912	24.9952	5.29436	33.4484	0.96649
									5100	8.45285	1.96618	25.0493	5.30733	33.5022	0.97115

## Sheet: SAXS-data Figure 4(A)
sample: PEO180 at Tc=60°C (Figure 4 (A))				sample: PEO180 at Tc=45°C (Figure 4 (A))				sample: POM130 at Tc=168°C (Figure 4 (A))				sample: POM130 at Tc=165°C (Figure 4 (A))				sample: POM130 at Tc=160°C (Figure 4 (A))				sample: POM130 at Tc=155°C (Figure 4 (A))				sample: POM212 at Tc=168°C (Figure 4 (A))				sample: POM212 at Tc=155°C (Figure 4 (A))				sample: PCL138 at Tc=50°C (Figure 4 (A))				sample: PCL138 at Tc=35°C (Figure 4 (A))
time t	cryst. thickness dc during primary crystallization	cryst. thickness dc after primary crystallization		time t	cryst. thickness dc during primary crystallization	cryst. thickness dc after primary crystallization		time t	cryst. thickness dc during primary crystallization	cryst. thickness dc after primary crystallization		time t	cryst. thickness dc during primary crystallization	cryst. thickness dc after primary crystallization		time t	cryst. thickness dc during primary crystallization	cryst. thickness dc after primary crystallization		time t	cryst. thickness dc during primary crystallization	cryst. thickness dc after primary crystallization		time t	cryst. thickness dc during primary crystallization	cryst. thickness dc after primary crystallization		time t	cryst. thickness dc during primary crystallization	cryst. thickness dc after primary crystallization		time t	cryst. thickness dc during primary crystallization	cryst. thickness dc after primary crystallization		time t	cryst. thickness dc during primary crystallization	cryst. thickness dc after primary crystallization
min	nm	nm		min	nm	nm		min	nm	nm		min	nm	nm		min	nm	nm		min	nm	nm		min	nm	nm		min	nm	nm		min	nm	nm		min	nm	nm
10	--	--		2	19.8187	--		10	--	--		5	--	--		2.5	--	--		2	10.1247	--		10	--	--		2	10.1051	--		10	--	--		2.5	6.31892	--
20	--	--		4	21.4434	--		20	--	--		10	--	--		5	--	--		4	10.4381	--		20	--	--		4	10.3646	--		30	--	--		5	6.392	--
30	--	--		6		22.0263		30	--	--		15	--	--		7.5	10.8533	--		6	10.685	--		30	--	--		6	10.6076	--		50	--	--		7.5	6.48041	--
40	--	--		8		22.391		40	--	--		20	--	--		10	11.1237	--		8	10.7486	--		40	--	--		8	10.6753	--		70	--	--		10	6.50307	--
50	--	--		10		22.5964		50	--	--		25	--	--		12.5	11.2605	--		10		10.8595		50	--	--		10		10.7481		90	--	--		12.5		6.52914
60	--	--		12		22.7794		60	--	--		30	--	--		15		11.3998		12		10.9224		60	--	--		12		10.8313		110	--	--		15		6.53135
70	--	--		14		22.815		70	--	--		35	--	--		17.5		11.4305		14		10.9587		70	13.6532	--		14		10.89		130	--	--		17.5		6.54368
80	--	--		16		22.9244		80	--	--		40	--	--		20		11.491		16		11.0288		80	13.5729	--		16		10.8794		150	--	--		20		6.55288
90	36.7735	--		18		23.0221		90	--	--		45	12.7605	--		22.5		11.5409		18		11.0558		90	13.6749	--		18		10.9464		170	--	--		22.5		6.58742
100	37.3578	--		20		23.1108		100	--	--		50	12.7357	--		25		11.5687		20		11.0708		100	13.6718	--		20		10.9832		190	--	--		25		6.57004
110	37.7651	--		22		23.1006		110	--	--		55	12.8379	--		27.5		11.6019		22		11.0958		110	13.7138	--		22		10.9816		210	--	--		27.5		6.58544
120	38.1018	--		24		23.1288		120	--	--		60	12.8648	--		30		11.6246		24		11.1348		120	13.745	--		24		11.017		230	--	--		30		6.58528
130	38.3822	--		26		23.183		130	--	--		65	12.9081	--		32.5		11.6662		26		11.1195		130	13.8023	--		26		11.031		250	--	--		32.5		6.62055
140	38.6064	--		28		23.1761		140	--	--		70	12.9247	--		35		11.6718		28		11.1289		140	13.8278	--		28		11.0605		270	--	--		35		6.60675
150	38.7388	--		30		23.2703		150	--	--		75	12.9899	--		37.5		11.7058		30		11.1678		150	13.8845	--		30		11.1085		290	--	--		37.5		6.60446
180	39.036	--		32		23.2564		180	--	--		80	13.0573	--		40		11.719		32		11.2284		180	13.9735	--		32		11.0965		310	7.71352	--		40		6.61866
210	39.2841	--		34		23.2948		210	--	--		85	13.0971	--		42.5		11.7724		34		11.2753		210	14.0679	--		34		11.132		330	7.72041	--		42.5		6.60933
240	39.5329	--		36		23.3204		240	--	--		90	13.1403	--		45		11.7725		36		11.2255		240	14.1423	--		36		11.1248		350	7.68168	--		45		6.62073
270	39.7221	--		38		23.359		270	--	--		95	13.2035	--		47.5		11.7848		38		11.3221		270	14.1984	--		38		11.1877		370	7.66349	--		47.5		6.62274
300	39.8645	--		40		23.3635		300	--	--		100	13.2447	--		50		11.8567		40		11.293		300		14.2867		40		11.1249		390	7.67053	--		50		6.63996
330		39.9517		42		23.3524		330	--	--		105	13.3141	--		55		11.8402		42		11.3551		330		14.3481		42		11.1976		410	7.6851	--		55		6.63741
360		39.8855		44		23.3353		360	15.755	--		110		13.3539		60		11.8796		44		11.307		360		14.4079		44		11.2171		430	7.69547	--		60		6.64909
390		40.0566		46		23.4312		390	15.7843	--		115		13.3995		65		11.9187		46		11.3487		390		14.4739		46		11.2423		450	7.65221	--		65		6.65997
420		40.17		48		23.4259		420	15.8184	--		120		13.4394		70		11.9514		48		11.3392		420		14.5237		48		11.2349		470	7.70693	--		70		6.65746
450		40.1571		50		23.3856		450	15.8505	--		125		13.4893		75		11.9937		50		11.3739		450		14.5833		50		11.2854		490	7.68164	--		75		6.67734
480		40.2107		55		23.4415		480	15.8808	--		130		13.5185		80		11.9982		52		11.3891		480		14.6332		52		11.2884		510	7.70988	--		80		6.68565
510		40.2108		60		23.4704		510	15.879	--		135		13.5478		85		12.0333		54		11.392		510		14.6916		54		11.2949		530	7.69829	--		85		6.66908
540		40.2431		65		23.445		540	15.9563	--		140		13.586		90		12.0904		56		11.391		540		14.7272		56		11.3221		550	7.7078	--		90		6.68385
570		40.2183		70		23.4896		570	15.982	--		145		13.6099		95		12.0922		58		11.4035		570		14.7755		58		11.3451		570	7.67401	--		95		6.69281
600		40.3167		75		23.5294		600	16.0172	--		150		13.6548		100		12.1218		60		11.4282		600		14.8142		60		11.3448		590	7.71264	--		100		6.70226
630		40.4104		80		23.5688		630	16.1211	--		160		13.7022		105		12.1511		65		11.4722		630		14.8687		65		11.3997		610	7.68017	--		105		6.7064
670		40.3989		85		23.602		670	16.1671	--		170		13.7796		110		12.175		70		11.4996		670		14.9222		70		11.4357		640	7.70149	--		110		6.70276
710		40.4985		90		23.5887		710	16.2581	--		180		13.8338		115		12.209		75		11.5205		710		14.9555		75		11.4591		670	7.74798	--		115		6.69731
750		40.4532		95		23.5991		750	16.3194	--		190		13.8898		120		12.2246		80		11.5627		750		15.0026		80		11.4613		700	7.72023	--		120		6.71303
790		40.5396		100		23.6187		790	16.4143	--		200		13.9471		125		12.2565		85		11.5652		790		15.0476		85		11.5008		730	7.75554	--		125		6.69936
830		40.4647		105		23.6051		830	16.4806	--		210		13.9989		130		12.29		90		11.5879		830		15.0844		90		11.56		760	7.74813	--		130		6.71982
870		40.6068		110		23.6266		870	16.5288	--		220		14.0599		135		12.3035		95		11.6154		870		15.1395		95		11.5906		790	7.75661	--		135		6.71398
910		40.6588		115		23.662		910	16.6215	--		230		14.1103		140		12.3208		100		11.6572		910		15.1889		100		11.6144		820	7.75196	--		140		6.73037
950		40.6546		120		23.6931		950	16.6831	--		240		14.141		155		12.3402		105		11.6766		950		15.1946		105		11.6251		850	7.77005	--		155		6.72851
990		40.6773		125		23.6161		990	16.7588	--		250		14.1898		160		12.3538		110		11.7063		990		15.2328		110		11.6686		880	7.76683	--		160		6.7278
1030		40.7161		130		23.6746		1030	16.8372	--		280		14.3223		170		12.3914		115		11.7032		1030		15.263		115		11.7015		910	7.78609	--		170		6.74011
1070		40.6844		135		23.7032		1070	16.8818	--		310		14.402		180		12.4293		120		11.724		1070		15.3179		120		11.7294		940	7.77836	--		180		6.73804
1110		40.7102		140		23.673		1110	16.9463	--		340		14.4673		190		12.482		125		11.7508		1110		15.3456		125		11.746		970	7.79089	--		190		6.74118
1150		40.8043		145		23.7162		1150	17.0048	--		370		14.5254		200		12.5167		130		11.7714		1150		15.3751		130		11.7724		1000	7.81527	--		200		6.74837
1190		40.7862		150		23.733		1190		17.0707		400		14.5801		210		12.5661		135		11.7951		1190		15.4083		135		11.821		1030	7.82039	--		210		6.77126
1240		40.757		160		23.7095		1240		17.1324		430		14.6316		220		12.5752		140		11.7974		1240		15.466		140		11.8256		1060	7.82732	--		220		6.7575
1290		40.7408		170		23.7302		1290		17.1978		460		14.6948		230		12.6206		145		11.8312		1290		15.4898		145		11.8268		1100	7.83132	--		230		6.75853
1340		40.8727		180		23.759		1340		17.2527		490		14.7304		240		12.6526		150		11.8563		1340		15.5027		150		11.8637		1140	7.84109	--		240		6.76888
1390		40.8467		190		23.782		1390		17.3072		520		14.7707		250		12.6802		155		11.8526		1390		15.5607		155		11.9003		1200	7.86292	--		250		6.77643
1440		40.9658		200		23.8031		1440		17.3779		550		14.8139		260		12.7177		160		11.8992		1440		15.6029		160		11.8991		1240	7.8727	--		260		6.77662
1490		40.7773		210		23.8282		1490		17.4013		580		14.8577		270		12.7406		170		11.9034		1490		15.6444		170		11.9412		1280	7.87612	--		270		6.78273
1540		40.8532		220		23.7994		1540		17.4519		610		14.8964		280		12.7662		180		11.9423		1540		15.6717		180		11.9845		1320	7.89311	--		280		6.78603
1590		40.9585		230		23.7894		1590		17.4938		640		14.9398		290		12.8013		190		11.9714		1590		15.7213		190		12.0247		1360	7.87709	--		290		6.79098
1640		40.9592		240		23.8377		1640		17.534		670		14.9694		300		12.8188		200		12.0016		1640		15.7343		200		12.0784		1400		7.89146		300		6.78927
1690		40.8957		250		23.8606		1690		17.5992		700		15.016		310		12.8499		210		12.038		1690		15.7591		210		12.1057		1440		7.89597		310		6.79607
1740		41.057		260		23.9121		1740		17.6401		740		15.0348		340		12.9241		220		12.0447		1740		15.7996		220		12.1448		1480		7.89972		340		6.81343
1790		40.9346		270		23.8591		1790		17.666		780		15.0699		370		12.9701		230		12.0819		1790		15.8013		230		12.1883		1520		7.92155		370		6.81791
1840		40.9735		280		23.8566		1840		17.7128		820		15.11		400		13.0217		240		12.1167		1840		15.847		240		12.2186		1560		7.91746		400		6.83328
1890		40.9325		290		23.8954		1890		17.7555		860		15.1473		430		13.0438		250		12.145		1890		15.8628		250		12.2511		1600		7.9243		430		6.83888
1940		40.9456		300		23.893		1940		17.7936		900		15.1724		460		13.0653		260		12.1711		1940		15.8886		260		12.2777		1640		7.93116		460		6.85292
2010		41.0912		330		24.0451		2010		17.821		940		15.2038		490		13.1169		270		12.1776		2010		15.9216		270		12.3149		1680		7.92891		490		6.85951
2080		41.1256		360		24.0622		2080		17.8801		980		15.2381		520		13.1463		280		12.2175		2080		15.9356		280		12.3388		1730		7.93322		520		6.86368
2150		41.0758		390		24.1375		2150		17.9024		1020		15.2623		550		13.1674		290		12.2343		2150		15.9791		290		12.3802		1780		7.9415		550		6.87674
2220		41.1253		420		24.1489		2220		17.9253		1060		15.2874		580		13.1884		300		12.2642		2220		16.0089		300		12.4127		1830		7.9437		580		6.87638
2290		40.9659		450		24.1753		2290		17.9659		1100		15.3093		610		13.2106		310		12.272		2290		16.0291		310		12.4439		1880		7.95836		610		6.87642
2360		41.1618		480		24.1871		2360		17.9946		1140		15.3187		640		13.2401		340		12.345		2360		16.0578		340		12.4904		1930		7.95137		640		6.88307
2430		41.1957		510		24.2208		2430		18.0255		1180		15.3449		670		13.2697		370		12.3684		2430		16.0739		370		12.5332		1980		7.9629		670		6.89087
2500		41.1776		540		24.2503		2500		18.0265		1220		15.3817		700		13.2885		400		12.3978		2500		16.0883		400		12.5923		2030		7.95989		700		6.88665
2570		41.1164		570		24.2693		2570		18.069		1260		15.3989		730		13.3121		430		12.4312		2570		16.1126		430		12.6209		2080		7.9682		730		6.89389
2640		41.1335		600		24.3015		2640		18.0793		1300		15.4093		760		13.3298		460		12.4488		2640		16.129		460		12.642		2130		7.97476		760		6.89883
2710		41.1799		630		24.2969		2710		18.1205		1350		15.4364		800		13.3586		490		12.4731		2710		16.1462		490		12.678		2180		7.97293		800		6.90303
2780		41.0739		660		24.2987		2780		18.1239		1400		15.4543		840		13.3601		520		12.4964		2780		16.1482		520		12.7085		2230		7.98576		840		6.91485
2850		41.0855		690		24.3298		2850		18.128		1450		15.4661		880		13.385		550		12.5206		2850		16.1859		550		12.7348		2280		7.98095		880		6.91216
2920		41.1066		720		24.3337		2920		18.1713		1500		15.489		920		13.3978		580		12.5409		2920		16.2118		580		12.7751		2330		7.97385		920		6.90835
2990		41.1497		750		24.3589		2990		18.1919		1550		15.5		960		13.424		610		12.5662		2990		16.2353		610		12.7989		2380		7.99357		960		6.92473
3120		41.246		790		24.3678		3120		18.2		1600		15.5125		1000		13.4453		640		12.5956		3120		16.2319		640		12.824		2430		7.97812		1000		6.92032
3250		41.304		830		24.4261		3250		18.2258		1650		15.5177		1040		13.4574		670		12.6143		3250		16.2556		670		12.8486		2500		7.99179		1040		6.92785
3380		41.5111		870		24.4045		3380		18.2521		1700		15.5446		1080		13.4687		700		12.6317		3380		16.2945		700		12.89		2570		8.0133		1080		6.93423
3510		41.3828		910		24.4122		3510		18.2811		1750		15.5421		1120		13.4974		730		12.6544		3510		16.3065		730		12.8968		2640		8.00697		1120		6.92897
3640		41.3452		950		24.4307		3640		18.2788		1800		15.5711		1160		13.515		760		12.6692		3640		16.3182		760		12.9243		2710		8.01401		1160		6.93945
3770		41.4199		990		24.4507		3770		18.2909		1850		15.597		1200		13.5297		800		12.6899		3770		16.3593		800		12.9495		2780		8.00906		1200		6.93591
3900		41.3612		1030		24.4296		3900		18.3203		1900		15.5844		1240		13.5435		840		12.7041		3900		16.3619		840		12.9784		2850		8.02319		1240		6.94308
4030		41.368		1070		24.467		4030		18.3179		1950		15.6248		1280		13.5598		880		12.7266		4030		16.3988		880		13.0043		2920		8.03116		1280		6.94714
4160		41.2607		1110		24.4853		4160		18.3286		2000		15.6279		1320		13.5644		920		12.7423		4160		16.401		920		13.0302		3090		8.01535		1320		6.95446
4290		41.3322		1150		24.4972		4290		18.3562		2050		15.6343		1360		13.5837		960		12.7647		4290		16.4302		960		13.06		3160		8.03903		1360		6.95698
4420		41.3612		1190		24.4746		4420		18.3394		2120		15.6485		1410		13.5966		1000		12.773		4420		16.4289		1000		13.0869		3230		8.02728		1410		6.95479
4550		41.3107		1230		24.4929		4550		18.3867		2190		15.6576		1460		13.6136		1040		12.7855		4550		16.4522		1040		13.1052		3300		8.03292		1460		6.96458
4680		41.3078		1270		24.5224		4680		18.3571		2260		15.6771		1510		13.621		1080		12.7859		4680		16.4582		1080		13.1255		3370		8.03591		1510		6.96544
4810		41.4725		1310		24.5474		4810		18.3628		2330		15.6742		1560		13.6261		1120		12.8103		4810		16.4973		1120		13.1281		3440		8.04087		1560		6.9662
4940		41.3244		1350		24.5236		4940		18.3865		2400		15.6868		1610		13.6558		1160		12.8106		4940		16.4847		1160		13.1515		3510		8.043		1610		6.97545
5070		41.5217		1400		24.5262						2470		15.697		1660		13.6658		1200		12.829						1200		13.1729		3630		8.04543		1660		6.97434
				1450		24.5636						2540		15.7009		1710		13.6752		1240		12.8255						1240		13.1924		3760		8.0585		1710		6.97045
				1500		24.5926						2610		15.7074		1760		13.6863		1280		12.8401						1280		13.2083		3890		8.07746		1760		6.97758
				1550		24.5491						2680		15.7028		1810		13.6927		1320		12.8564						1320		13.228		4020		8.07444		1810		6.97741
				1600		24.5968						2750		15.7149		1860		13.7045		1360		12.866						1360		13.2422		4150		8.06623		1860		6.98501
				1650		24.5722						2820		15.7423		1910		13.716		1410		12.8835						1410		13.2627		4280		8.07485		1910		6.9864
				1700		24.6068						2890		15.7332		1960		13.7313		1460		12.8802						1460		13.2873		4410		8.08538		1960		6.98568
				1750		24.6229						2960		15.7295		2010		13.7275		1510		12.9138						1510		13.2927		4540		8.08083		2010		6.99459
				1800		24.6186						3030		15.7517		2060		13.7428		1560		12.9166						1560		13.3197		4670		8.08361		2060		6.9953
				1850		24.643						3100		15.7507		2110		13.7442		1610		12.9213						1610		13.3406		4800		8.0854		2110		7.00743
				1900		24.676						3230		15.7644		2180		13.7619		1660		12.9307						1660		13.3568		4930		8.1054		2180		6.99619
				1950		24.656						3370		15.7513		2250		13.7653		1710		12.9448						1710		13.366		5060		8.10351		2250		7.00438
				2000		24.65						3500		15.7614		2320		13.7887		1760		12.9451						1760		13.3781		5190		8.09376		2320		7.00817
				2050		24.6756						3630		15.7677		2390		13.7988		1810		12.9607						1810		13.3995		5320		8.11153		2390		7.01987
				2100		24.684						3760		15.7859		2460		13.7991		1860		12.9685						1860		13.4044		5450		8.10085		2460		7.00995
				2170		24.6897						3890		15.7912		2530		13.8063		1910		13.0023						1910		13.4294		5580		8.11778		2530		7.01711
				2240		24.6598						4020		15.7922		2600		13.8162		1960		12.9999						1960		13.4424						2600		7.01227
				2310		24.6866						4150		15.7528		2670		13.8214		2010		12.9948						2010		13.459						2670		7.02253
				2380		24.7189						4280		15.7741		2740		13.855		2060		13.009						2060		13.4657						2740		7.01783
				2450		24.7069						4410		15.7926		2810		13.8397		2110		13.0386						2110		13.4709						2810		7.02909
				2520		24.7405						4540		15.7745		2880		13.8567		2180		13.0418						2180		13.4837						2880		7.02582
				2590		24.7572						4570		15.7684		2950		13.846		2250		13.0539						2250		13.4949						2950		7.0251
				2660		24.728						4700		15.779		3020		13.8722		2320		13.0523						2320		13.5193						3020		7.02912
				2730		24.7891						4830		15.7663		3090		13.8732		2390		13.059						2390		13.5284						3090		7.03213
				2800		24.8064						4960		15.7798		3160		13.8797		2460		13.0763						2460		13.5472						3160		7.02868
				2870		24.8058										3290		13.884		2530		13.0668						2530		13.5545						3290		7.03592
				2940		24.7908										3420		13.8826		2600		13.0517						2600		13.5801						3420		7.0495
				3010		24.7938										3550		13.9		2670		13.0813						2670		13.5841						3550		7.0557
				3080		24.8178										3680		13.8941		2740		13.1066						2740		13.6001						3680		7.05718
				3150		24.8524										3810		13.8873		2810		13.1093						2810		13.6023						3810		7.07765
				3280		24.8211										3940		13.9112		2880		13.114						2880		13.6218						3940		7.0626
				3410		24.8832										4070		13.9064		2950		13.117						2950		13.6419						4070		7.06461
				3540		24.8911										4200		13.9155		3020		13.115						3020		13.6317						4200		7.07327
				3670		24.9215										4330		13.9119		3090		13.1374						3090		13.6257						4330		7.06656
				3800		24.9481										4460		13.9304		3160		13.1493						3160		13.6537						4460		7.0725
				3930		24.8916										4590		13.916		3290		13.1472						3290		13.6815						4590		7.07107
				4060		24.8947										4720		13.9225		3420		13.1513						3420		13.6903						4720		7.08449
				4190		24.9414										4850		13.941		3550		13.177						3550		13.7037						4850		7.07933
				4320		24.9415										4980		13.9513		3680		13.144						3680		13.7123						4980		7.07976
				4450		24.9293										5110		13.9418		3810		13.1506						3810		13.6986						5110		7.07888
				4580		24.9873														3940		13.1659						3940		13.7071
				4710		25.0078														4070		13.1813						4070		13.7043
				4840		25.0095														4200		13.1562						4200		13.7394
				4970		24.9952														4330		13.1998						4330		13.7166
				5100		25.0493														4460		13.1937						4460		13.7403
																				4590		13.1774						4590		13.7353
																				4720		13.1776						4720		13.7641
																				4850		13.1889						4850		13.7537
																				4990		13.2051						4990		13.7475
																				5120		13.219						5120		13.7824
